# Supplementary material for: K2Pb(H2C3N3O3)4(H2O)4: a potential UV nonlinear optical material with large birefringence
Source: Royal Society of Chemistry journal article supplement (doi:10.1039/d1qi00595b), 2021-01-01
Supplement: d1qi00595b1.pdf [file d1qi00595b1.pdf]

## Electronic Supplementary Information (ESI)

### **$\text{K}_2\text{Pb}(\text{H}_2\text{C}_3\text{N}_3\text{O}_3)_4(\text{H}_2\text{O})_4$ : A potential UV nonlinear optical material with large birefringence**

Yan Chen,<sup>a,b,c,d</sup> Chunli Hu,<sup>a</sup> Zhi Fang,<sup>a</sup> Jianggao Mao<sup>\*a</sup>

<sup>a</sup> State Key Laboratory of Structural Chemistry, Fujian Institute of Research on the Structure of Matter, Chinese Academy of Sciences, Fuzhou 350002, China

<sup>b</sup> School of Physical Science and Technology, ShanghaiTech University, Shanghai 201210, China

<sup>c</sup> University of Chinese Academy of Sciences, Beijing 100049, China

<sup>d</sup> Shanghai Advanced Research Institute, Chinese Academy of Sciences, Shanghai 201210, China

Email: [mjg@fjirsm.ac.cn](mailto:mjg@fjirsm.ac.cn)

## Table of Contents

**Table S1.** Bond lengths (Å) for  $\text{K}_2\text{Pb}(\text{H}_2\text{C}_3\text{N}_3\text{O}_3)_4(\text{H}_2\text{O})_4$  and  $\text{K}_3\text{Pb}(\text{H}_2\text{C}_3\text{N}_3\text{O}_3)_5(\text{H}_2\text{O})_6$ .

**Table S2.** Hydrogen bonds for  $\text{K}_2\text{Pb}(\text{H}_2\text{C}_3\text{N}_3\text{O}_3)_4(\text{H}_2\text{O})_4$  and  $\text{K}_3\text{Pb}(\text{H}_2\text{C}_3\text{N}_3\text{O}_3)_5(\text{H}_2\text{O})_6$  [Å and deg.].

**Figure S1.** Crystal pictures of  $\text{K}_2\text{Pb}(\text{H}_2\text{C}_3\text{N}_3\text{O}_3)_4(\text{H}_2\text{O})_4$  (a) and  $\text{K}_3\text{Pb}(\text{H}_2\text{C}_3\text{N}_3\text{O}_3)_5(\text{H}_2\text{O})_6$  (b).

**Figure S2.** Powder X-ray diffractions patterns of  $\text{K}_2\text{Pb}(\text{H}_2\text{C}_3\text{N}_3\text{O}_3)_4(\text{H}_2\text{O})_4$  (a) and  $\text{K}_3\text{Pb}(\text{H}_2\text{C}_3\text{N}_3\text{O}_3)_5(\text{H}_2\text{O})_6$  (b).

**Figure S3.** Energy dispersive X-ray spectroscopy analysis of  $\text{K}_2\text{Pb}(\text{H}_2\text{C}_3\text{N}_3\text{O}_3)_4(\text{H}_2\text{O})_4$  (a) and  $\text{K}_3\text{Pb}(\text{H}_2\text{C}_3\text{N}_3\text{O}_3)_5(\text{H}_2\text{O})_6$  (b).

**Figure S4.** Coordination geometries around K(1) (a), K(2) (b) and Pb(1) (c) in compound  $\text{K}_2\text{Pb}(\text{H}_2\text{C}_3\text{N}_3\text{O}_3)_4(\text{H}_2\text{O})_4$ .

**Figure S5.** Coordination geometries around K(1) and K(2) (a), K(3) (b), and Pb(1) (c) in compound  $\text{K}_3\text{Pb}(\text{H}_2\text{C}_3\text{N}_3\text{O}_3)_5(\text{H}_2\text{O})_6$ .

**Figure S6.** The experimental IR spectra of  $\text{K}_2\text{Pb}(\text{H}_2\text{C}_3\text{N}_3\text{O}_3)_4(\text{H}_2\text{O})_4$  (a) and  $\text{K}_3\text{Pb}(\text{H}_2\text{C}_3\text{N}_3\text{O}_3)_5(\text{H}_2\text{O})_6$  (b).

**Figure S7.** The thermogravimetric analyses (TGA) curves of  $\text{K}_2\text{Pb}(\text{H}_2\text{C}_3\text{N}_3\text{O}_3)_4(\text{H}_2\text{O})_4$  (a) and  $\text{K}_3\text{Pb}(\text{H}_2\text{C}_3\text{N}_3\text{O}_3)_5(\text{H}_2\text{O})_6$  (b).

**Figure S8.** The band structures of  $\text{K}_2\text{Pb}(\text{H}_2\text{C}_3\text{N}_3\text{O}_3)_4(\text{H}_2\text{O})_4$  (a) and  $\text{K}_3\text{Pb}(\text{H}_2\text{C}_3\text{N}_3\text{O}_3)_5(\text{H}_2\text{O})_6$  (b).

**Figure S9.** The total and partial densities of states of  $\text{K}_2\text{Pb}(\text{H}_2\text{C}_3\text{N}_3\text{O}_3)_4(\text{H}_2\text{O})_4$  (a) and  $\text{K}_3\text{Pb}(\text{H}_2\text{C}_3\text{N}_3\text{O}_3)_5(\text{H}_2\text{O})_6$  (b).

**Table S1.** Bond lengths (Å) for  $K_2Pb(H_2C_3N_3O_3)_4(H_2O)_4$  and  $K_3Pb(H_2C_3N_3O_3)_5(H_2O)_6$ .

| <b><math>K_2Pb(H_2C_3N_3O_3)_4(H_2O)_4</math></b> |          |              |           |
|---------------------------------------------------|----------|--------------|-----------|
| K(1)-O(2)#1                                       | 2.731(5) | C(1)-N(1)    | 1.380(9)  |
| K(1)-O(2)                                         | 2.731(5) | C(2)-O(2)    | 1.217(9)  |
| K(1)-O(5)#1                                       | 2.705(5) | C(2)-N(2)    | 1.367(10) |
| K(1)-O(5)                                         | 2.705(5) | C(2)-N(1)    | 1.372(9)  |
| K(1)-O(1W)                                        | 2.682(8) | C(3)-O(3)    | 1.250(9)  |
| K(1)-O(3W)#2                                      | 2.736(8) | C(3)-N(3)    | 1.351(9)  |
| K(2)-O(2)#3                                       | 2.987(5) | C(3)-N(2)    | 1.396(10) |
| K(2)-O(2)#4                                       | 2.987(5) | C(4)-O(4)    | 1.250(9)  |
| K(2)-O(5)#1                                       | 2.875(6) | C(4)-N(6)    | 1.349(10) |
| K(2)-O(5)                                         | 2.875(6) | C(4)-N(4)    | 1.386(9)  |
| K(2)-O(6)#5                                       | 2.952(5) | C(5)-O(5)    | 1.230(9)  |
| K(2)-O(6)#6                                       | 2.952(5) | C(5)-N(5)    | 1.361(9)  |
| K(2)-O(2W)#6                                      | 2.734(8) | C(5)-N(4)    | 1.379(9)  |
| K(2)-O(4W)#6                                      | 2.892(9) | C(6)-O(6)    | 1.234(9)  |
| Pb(1)-N(6)                                        | 2.575(6) | C(6)-N(6)    | 1.353(9)  |
| Pb(1)-N(6)#7                                      | 2.576(6) | C(6)-N(5)    | 1.400(9)  |
| Pb(1)-O(4)                                        | 3.060(5) | N(1)-H(1)    | 0.8600    |
| Pb(1)-O(4)#7                                      | 3.060(5) | N(2)-H(2)    | 0.8602    |
| Pb(1)-O(1W)#8                                     | 2.836(7) | N(4)-H(4)    | 0.8598    |
| Pb(1)-O(2W)                                       | 2.583(8) | N(5)-H(5)    | 0.8600    |
| Pb(1)-O(3W)                                       | 2.550(8) | O(1W)-H(1WA) | 0.9139    |
| Pb(1)-O(4W)                                       | 2.589(7) | O(2W)-H(2WA) | 0.9429    |
| C(1)-O(1)                                         | 1.264(9) | O(3W)-H(3WA) | 1.0063    |
| C(1)-N(3)                                         | 1.348(9) | O(4W)-H(4WA) | 0.96(10)  |

Symmetry transformations used to generate equivalent atoms:

#1 x, -y+1, z    #2 x+1/2, y+1/2, z    #3 x, -y+1, z+1    #4 x, y, z+1  
 #5 x-1/2, -y+1/2, z    #6 x-1/2, y+1/2, z    #7 x, -y, z    #8 x-1/2, y-1/2, z

| <b><math>K_3Pb(H_2C_3N_3O_3)_5(H_2O)_6</math></b> |          |           |          |
|---------------------------------------------------|----------|-----------|----------|
| K(1)-O(1)#1                                       | 2.804(3) | C(2)-N(2) | 1.335(4) |
| K(1)-O(1)#2                                       | 2.804(3) | C(2)-N(1) | 1.382(4) |
| K(1)-O(6)                                         | 2.727(3) | C(3)-O(3) | 1.239(4) |
| K(1)-O(6)#3                                       | 2.727(3) | C(3)-N(2) | 1.337(4) |
| K(1)-O(3W)#4                                      | 3.261(4) | C(3)-N(3) | 1.384(4) |
| K(1)-O(5W)                                        | 2.793(4) | C(4)-O(4) | 1.238(4) |
| K(1)-O(6W)                                        | 2.773(4) | C(4)-N(4) | 1.340(4) |
| K(2)-O(1)                                         | 3.053(2) | C(4)-N(6) | 1.384(4) |
| K(2)-O(1)#5                                       | 3.053(2) | C(5)-O(5) | 1.239(4) |
| K(2)-O(1)#6                                       | 3.306(3) | C(5)-N(4) | 1.336(4) |
| K(2)-O(1)#7                                       | 3.306(3) | C(5)-N(5) | 1.381(4) |
| K(2)-O(5)                                         | 2.781(2) | C(6)-O(6) | 1.227(4) |
| K(2)-O(5)#5                                       | 2.781(2) | C(6)-N(6) | 1.358(4) |

|              |          |                |          |
|--------------|----------|----------------|----------|
| K(2)-O(3W)   | 2.831(4) | C(6)-N(5)      | 1.358(4) |
| K(2)-O(4W)   | 2.809(4) | C(7)-O(7)      | 1.222(5) |
| K(2)-O(6W)#8 | 2.841(5) | C(7)-N(7)#11   | 1.361(3) |
| K(3)-O(3)#9  | 3.028(3) | C(7)-N(7)      | 1.361(3) |
| K(3)-O(3)#1  | 3.028(3) | C(8)-O(8)      | 1.239(4) |
| K(3)-O(6)#9  | 3.401(3) | C(8)-N(8)      | 1.340(3) |
| K(3)-O(6)#1  | 3.401(3) | C(8)-N(7)      | 1.383(4) |
| K(3)-O(7)    | 2.786(2) | N(1)-H(1)      | 0.8600   |
| K(3)-O(7)#10 | 2.786(2) | N(3)-H(3)      | 0.8600   |
| K(3)-O(1W)   | 3.002(5) | N(5)-H(5)      | 0.8600   |
| K(3)-O(2W)   | 2.778(4) | N(6)-H(6)      | 0.8600   |
| K(3)-O(5W)#9 | 2.848(5) | N(7)-H(7)      | 0.8600   |
| Pb(1)-N(4)   | 2.609(3) | O(1W)-H(1WA)   | 1.0101   |
| Pb(1)-N(4)#5 | 2.610(3) | O(2W)-H(2WA)   | 0.8500   |
| Pb(1)-O(4)   | 2.927(2) | O(2W)-H(2WA)#5 | 0.8499   |
| Pb(1)-O(4)#5 | 2.927(2) | O(3W)-H(3WA)   | 0.8501   |
| Pb(1)-O(1W)  | 2.777(4) | O(3W)-H(3WA)#5 | 0.8500   |
| Pb(1)-O(2W)  | 2.453(4) | O(4W)-H(4WA)   | 0.8500   |
| Pb(1)-O(3W)  | 2.746(4) | O(4W)-H(4WA)#5 | 0.8500   |
| Pb(1)-O(4W)  | 2.616(4) | O(5W)-H(5WA)   | 0.8499   |
| C(1)-O(1)    | 1.226(4) | O(5W)-H(5WA)#3 | 0.8500   |
| C(1)-N(1)    | 1.362(4) | O(6W)-H(6WA)   | 0.8500   |
| C(1)-N(3)    | 1.363(4) | O(6W)-H(6WA)#3 | 0.8500   |
| C(2)-O(2)    | 1.245(4) |                |          |

Symmetry transformations used to generate equivalent atoms:

#1  $x-1/2, -y+3/2, z$  #2  $x-1/2, y+1/2, z$  #3  $x, -y+2, z$  #4  $-x+1/2, -y+3/2, -z$  #5  $x, -y+1, z$   
#6  $-x+1, -y+1, -z$  #7  $-x+1, y, -z$  #8  $x+1/2, y-1/2, z$  #9  $x-1/2, y-1/2, z$  #10  $-x, -y+1, -z+1$   
#11  $-x, y, -z+1$

**Table S2.** Hydrogen bonds for  $K_2Pb(H_2C_3N_3O_3)_4(H_2O)_4$  and  $K_3Pb(H_2C_3N_3O_3)_5(H_2O)_6$  [ $\text{\AA}$  and deg.].

| <b><math>K_2Pb(H_2C_3N_3O_3)_4(H_2O)_4</math></b> |               |                 |                 |                  |
|---------------------------------------------------|---------------|-----------------|-----------------|------------------|
| <b>D-H...A</b>                                    | <b>d(D-H)</b> | <b>d(H...A)</b> | <b>d(D...A)</b> | <b>&lt;(DHA)</b> |
| N(1)-H(1)...O(6)#1                                | 0.86          | 1.92            | 2.765(8)        | 165.4            |
| N(2)-H(2)...O(4)#2                                | 0.86          | 1.97            | 2.827(8)        | 175.7            |
| N(4)-H(4)...O(3)#3                                | 0.86          | 1.90            | 2.744(8)        | 165.7            |
| N(5)-H(5)...O(1)#4                                | 0.86          | 1.96            | 2.815(8)        | 178.0            |
| O(1W)-H(1WA)...O(1)#2                             | 0.91          | 2.02            | 2.896(7)        | 159.2            |
| O(2W)-H(2WA)...O(3)#5                             | 0.94          | 1.77            | 2.692(6)        | 164.2            |
| O(3W)-H(3WA)...O(1)#6                             | 1.01          | 1.79            | 2.776(6)        | 166.8            |
| O(4W)-H(4WA)...N(3)#6                             | 0.96(10)      | 2.01(10)        | 2.926(8)        | 160(9)           |

Symmetry transformations used to generate equivalent atoms:

#1  $x-1/2, -y+1/2, z-1$  #2  $x+1/2, -y+1/2, z$  #3  $x-1/2, -y+1/2, z$   
#4  $x+1/2, -y+1/2, z+1$  #5  $x, -y, z$  #6  $x, y, z+1$

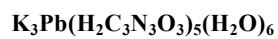

| D-H...A               | d(D-H) | d(H...A) | d(D...A) | <(DHA) |
|-----------------------|--------|----------|----------|--------|
| N(1)-H(1)...O(2)#1    | 0.86   | 1.93     | 2.781(3) | 173.0  |
| N(3)-H(3)...O(5)      | 0.86   | 1.94     | 2.794(3) | 173.5  |
| N(5)-H(5)...O(3)      | 0.86   | 1.90     | 2.754(3) | 173.0  |
| N(6)-H(6)...O(8)      | 0.86   | 1.97     | 2.829(3) | 173.8  |
| N(7)-H(7)...O(4)      | 0.86   | 1.95     | 2.812(3) | 175.2  |
| O(1W)-H(1WA)...O(6)#2 | 1.01   | 1.90     | 2.891(4) | 166.2  |
| O(2W)-H(2WA)...N(2)#3 | 0.85   | 1.90     | 2.733(3) | 168.1  |
| O(3W)-H(3WA)...O(2)#4 | 0.85   | 2.02     | 2.863(3) | 172.3  |
| O(4W)-H(4WA)...N(8)#5 | 0.85   | 2.03     | 2.880(4) | 177.5  |
| O(6W)-H(6WA)...O(8)#6 | 0.85   | 2.00     | 2.827(3) | 165.6  |

Symmetry transformations used to generate equivalent atoms:

#1  $-x+3/2, -y+3/2, -z$     #2  $-x+1/2, y-1/2, -z+1$     #3  $x-1/2, y-1/2, z$   
 #4  $x-1/2, -y+3/2, z$     #5  $x+1/2, y-1/2, z$     #6  $x, -y+2, z$

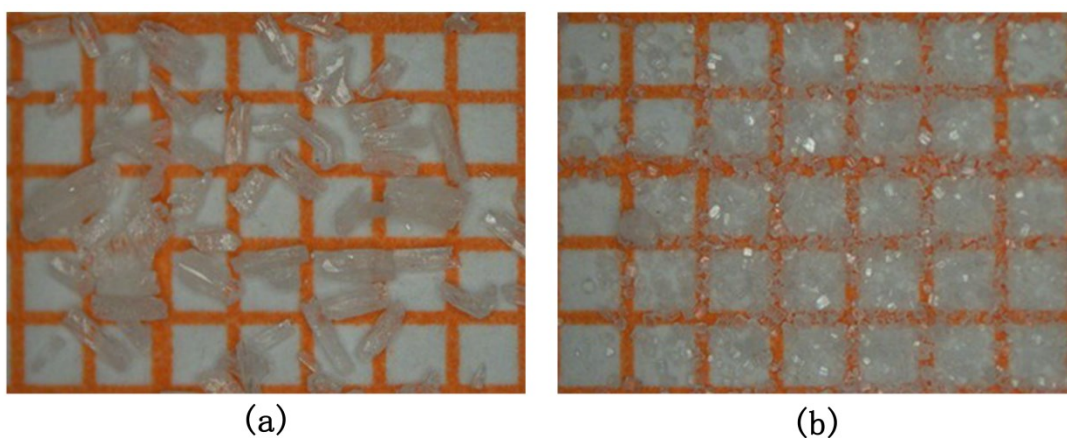

**Figure S1.** Crystal pictures of  $\text{K}_2\text{Pb}(\text{H}_2\text{C}_3\text{N}_3\text{O}_3)_4(\text{H}_2\text{O})_4$  (a) and  $\text{K}_3\text{Pb}(\text{H}_2\text{C}_3\text{N}_3\text{O}_3)_5(\text{H}_2\text{O})_6$  (b).

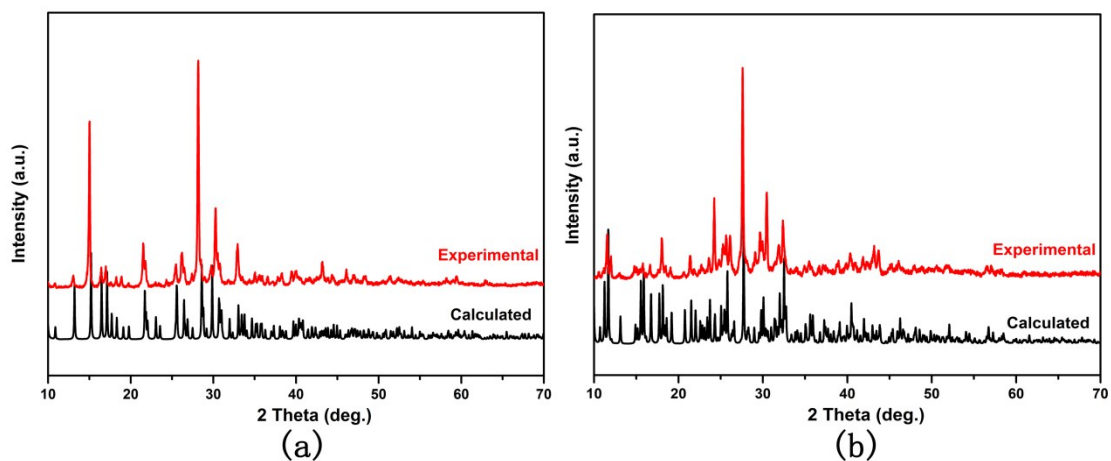

**Figure S2.** Powder X-ray diffractions patterns of  $K_2Pb(H_2C_3N_3O_3)_4(H_2O)_4$  (a) and  $K_3Pb(H_2C_3N_3O_3)_5(H_2O)_6$  (b).

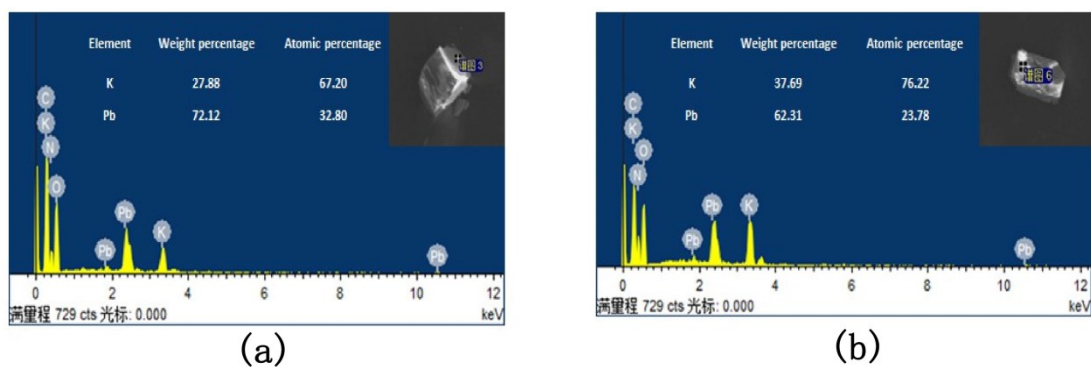

**Figure S3.** Energy dispersive X-ray spectroscopy analysis of  $K_2Pb(H_2C_3N_3O_3)_4(H_2O)_4$  (a) and  $K_3Pb(H_2C_3N_3O_3)_5(H_2O)_6$  (b).

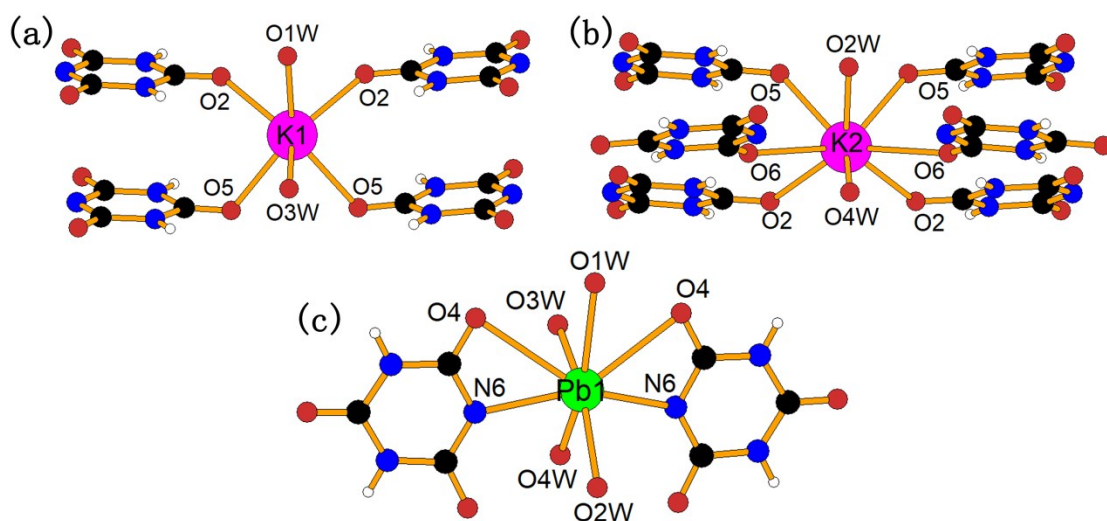

**Figure S4.** Coordination geometries around K(1) (a), K(2) (b) and Pb(1) (c) in compound  $K_2Pb(H_2C_3N_3O_3)_4(H_2O)_4$ .

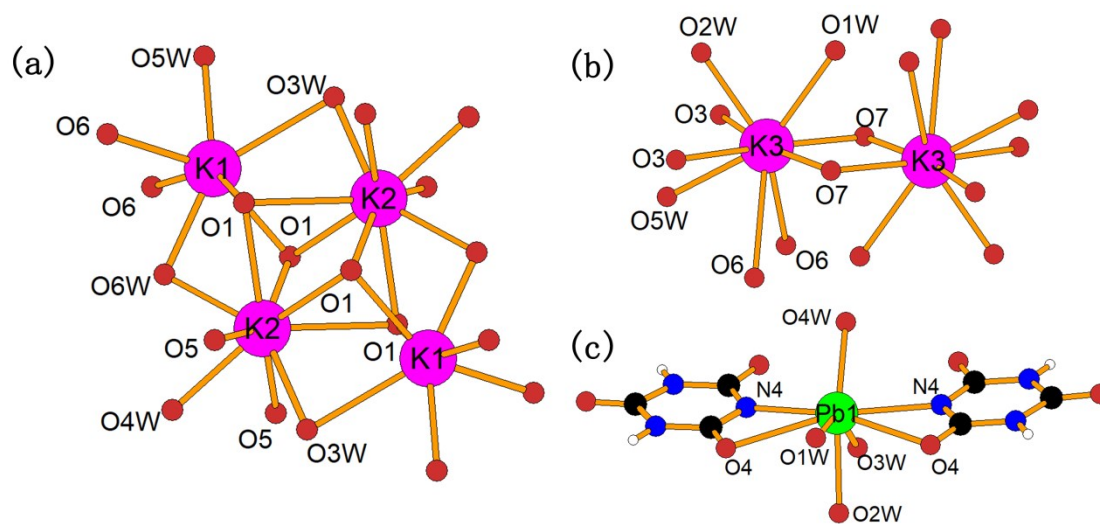

**Figure S5.** Coordination geometries around K(1) and K(2) (a), K(3) (b), and Pb(1) (c) in compound  $\text{K}_3\text{Pb}(\text{H}_2\text{C}_3\text{N}_3\text{O}_3)_5(\text{H}_2\text{O})_6$ .

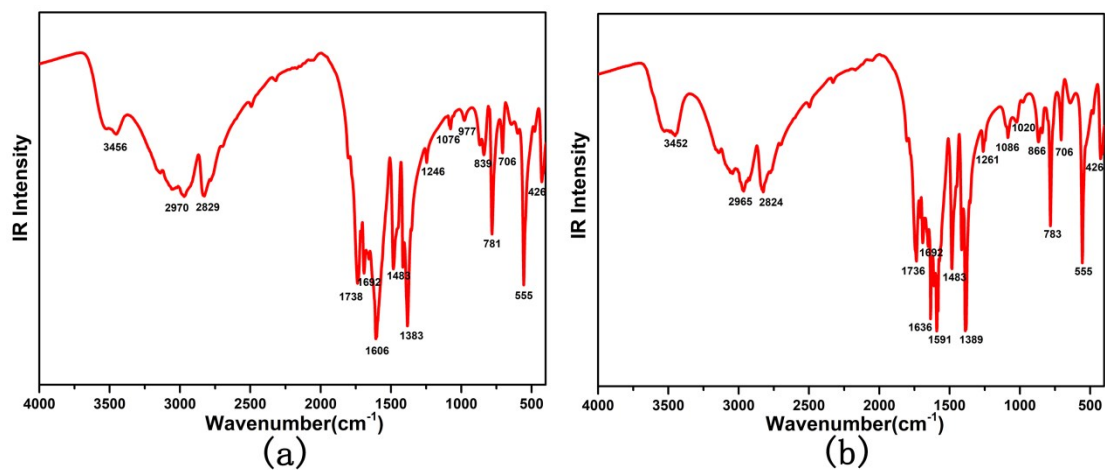

**Figure S6.** The experimental IR spectra of  $\text{K}_2\text{Pb}(\text{H}_2\text{C}_3\text{N}_3\text{O}_3)_4(\text{H}_2\text{O})_4$  (a) and  $\text{K}_3\text{Pb}(\text{H}_2\text{C}_3\text{N}_3\text{O}_3)_5(\text{H}_2\text{O})_6$  (b).

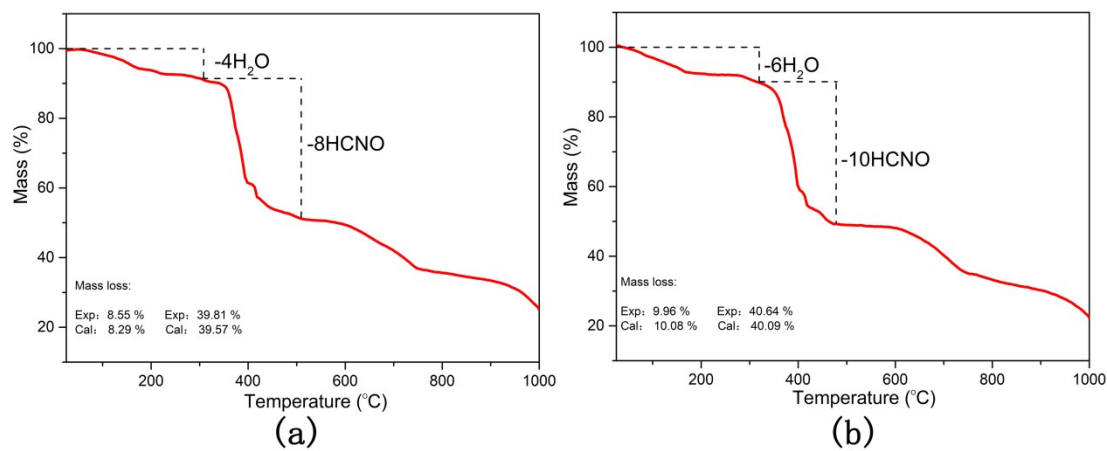

**Figure S7.** The thermogravimetric analyses (TGA) curves of  $\text{K}_2\text{Pb}(\text{H}_2\text{C}_3\text{N}_3\text{O}_3)_4(\text{H}_2\text{O})_4$  (a) and  $\text{K}_3\text{Pb}(\text{H}_2\text{C}_3\text{N}_3\text{O}_3)_5(\text{H}_2\text{O})_6$  (b).

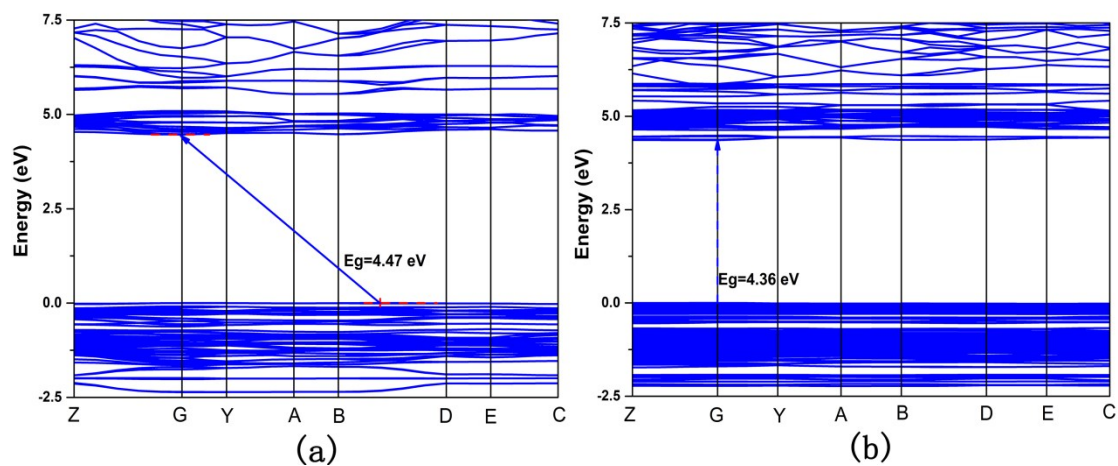

**Figure S8.** The band structures of  $K_2Pb(H_2C_3N_3O_3)_4(H_2O)_4$  (a) and  $K_3Pb(H_2C_3N_3O_3)_5(H_2O)_6$  (b).

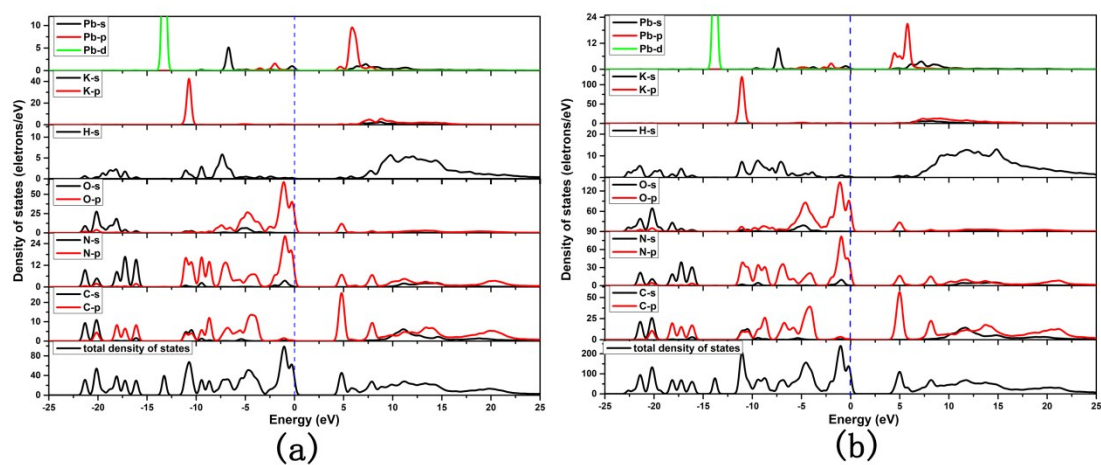

**Figure S9.** The total and partial densities of states of  $K_2Pb(H_2C_3N_3O_3)_4(H_2O)_4$  (a) and  $K_3Pb(H_2C_3N_3O_3)_5(H_2O)_6$  (b).
